# Supplementary material
Source: PubMed Central journal article supplement (PMC3466914)
Supplement: Supp_Fig1.pdf [file Supp_Fig1.pdf]

## Supplementary Data

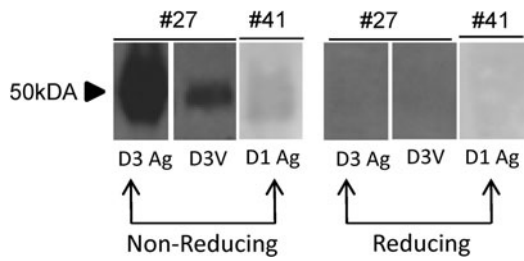

**SUPPLEMENTARY FIG. S1.** Antigens recognized by hMAbs generated by donor 2. Viral proteins from purified DENV-3 virions and inactivated lysates of DENV were separated by SDS-PAGE. Western blots were performed under reducing and non-reducing conditions to identify the viral antigens recognized by hMAbs #27 and #41. Both MAbs bound to a protein band of approximately ~55–60 kDa, consistent with the molecular weight of DENV E protein (64.31 kDa), under non-reducing conditions.
